# Supplementary material
Source: PubMed Central journal article supplement (PMC9903784)
Supplement: mmc1.pdf [file mmc1.pdf]

**Cell Genomics, Volume 2**

**Supplemental information**

**Identification of risk genes for**

**Alzheimer's disease by gene embedding**

**Yashwanth Lagisetty, Thomas Bourquard, Ismael Al-Ramahi, Carl Grant Mangleburg, Samantha Mota, Shirin Soleimani, Joshua M. Shulman, Juan Botas, Kwanghyuk Lee, and Olivier Lichtarge**

1 **Supplementary Information for**  
2 **Identification of Risk Genes for Alzheimer's Disease by Gene**  
3 **Embedding.**

4  
5 Yashwanth Lagisetty<sup>1,2</sup>, Thomas Bourquard<sup>2</sup>, Ismael Al-Ramahi<sup>2,3,4</sup>, Carl Grant Mangleburg<sup>2</sup>,  
6 Samantha Mota<sup>2</sup>, Shirin Soleimani<sup>2</sup>, Joshua M. Shulman<sup>2,3,4,5,6</sup>, Juan Botas<sup>2,3,4</sup>, Kwanghyuk Lee<sup>2</sup>,  
7 Olivier Lichtarge\*<sup>2,4,7</sup>

8 \* To whom correspondence should be addressed:

9 Olivier Lichtarge MD, PhD

10 **Email:** [lichtarge@bcm.edu](mailto:lichtarge@bcm.edu)

11

12

13 **Supplemental Figure Legends**

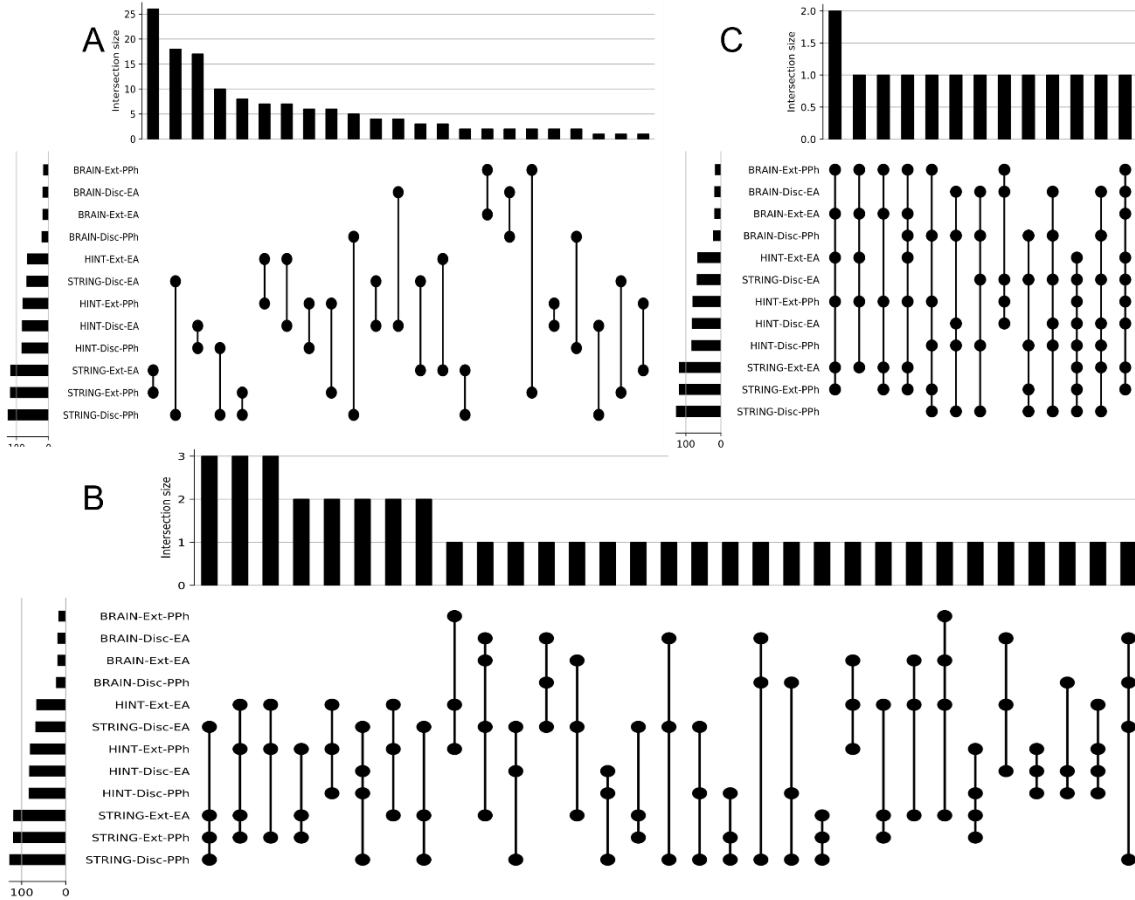

14

15 **Figure S1. UpSet plot of combinatorial intersections between all 12 GeneEMBED**

16 **experiments, Related to Figure 4. (A) pairwise intersections. (B) Intersections between 3-4 sets.**

17 (C) Intersections between 5+ sets. Set of 143 unique genes from all intersections are used for 'high-  
 18 confidence' gene set.  
 19

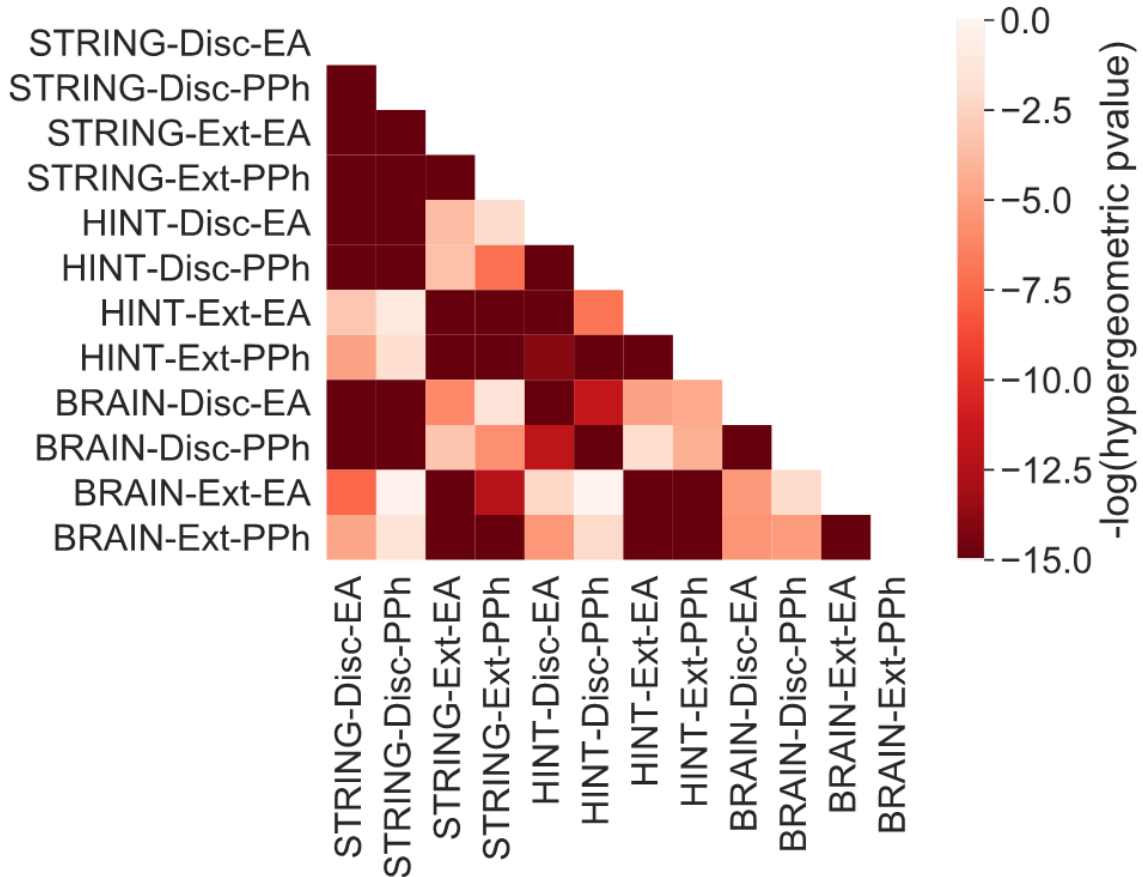

20  
 21 **Figure S2. GeneEMBED candidates are consistently identified across various cohorts,**  
 22 **networks, and VIS systems, Related to Figure 4.** One-tailed hypergeometric overlap tests were  
 23 done on every pairwise combination of cohort-network-VIS experiments. Among 66 independent  
 24 pairwise tests, only 11 did not demonstrate statistically significant hypergeometric p-values ( $p <$   
 25  $0.05$ ,  $\log(p) < -2.99$ ).  
 26

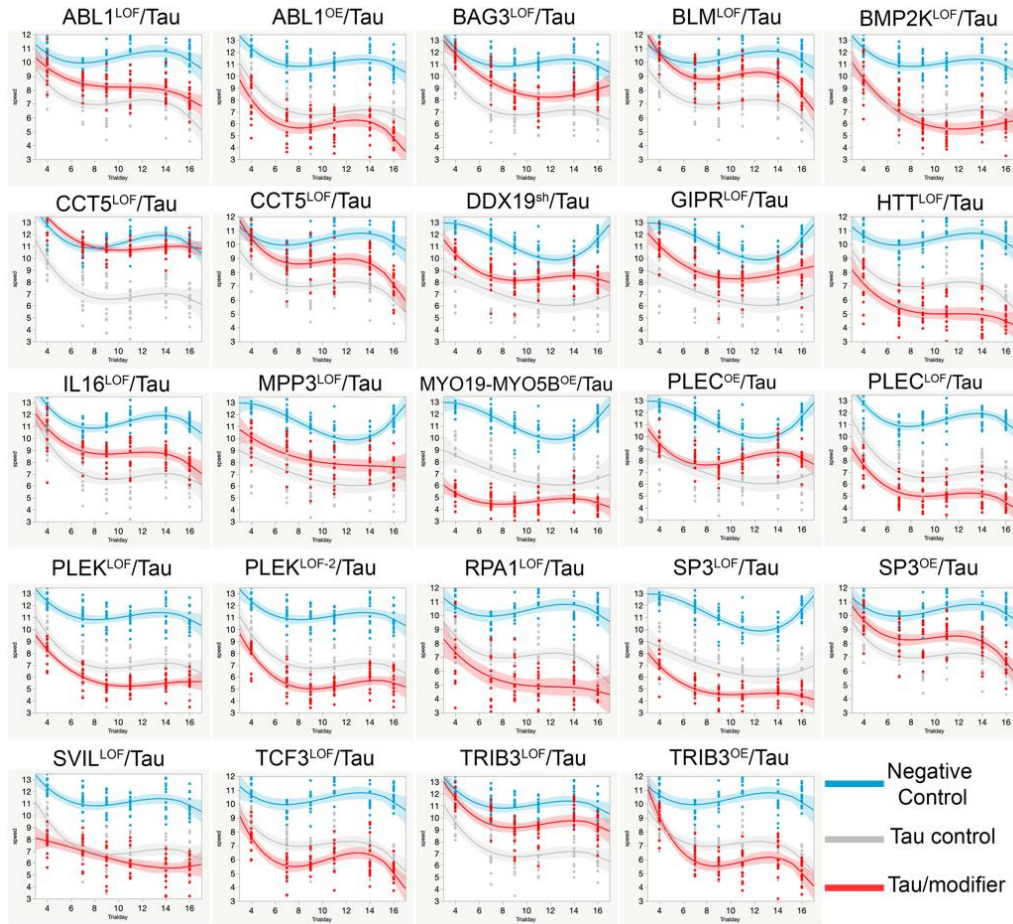

27

28 **Figure S3. GeneEMBED candidates modulate tau-induced neuronal dysfunction, Related to**

29 **Figure 4.** Regressions representing average speed as a function of age in control fruit flies (blue)

30 or flies expressing human wild type *Tau* either alone (grey) or together with the above indicated

31 modifiers (red) on the corresponding *Drosophila* homolog (see supplementary table 12 for genotype

32 details). Charts show third degree polynomials and confidence intervals. All differential effects were

33 statistically significant ( $p < 0.01$ ) following ANOVA analysis on Linear mixed models regression with

34 fitted splines

35

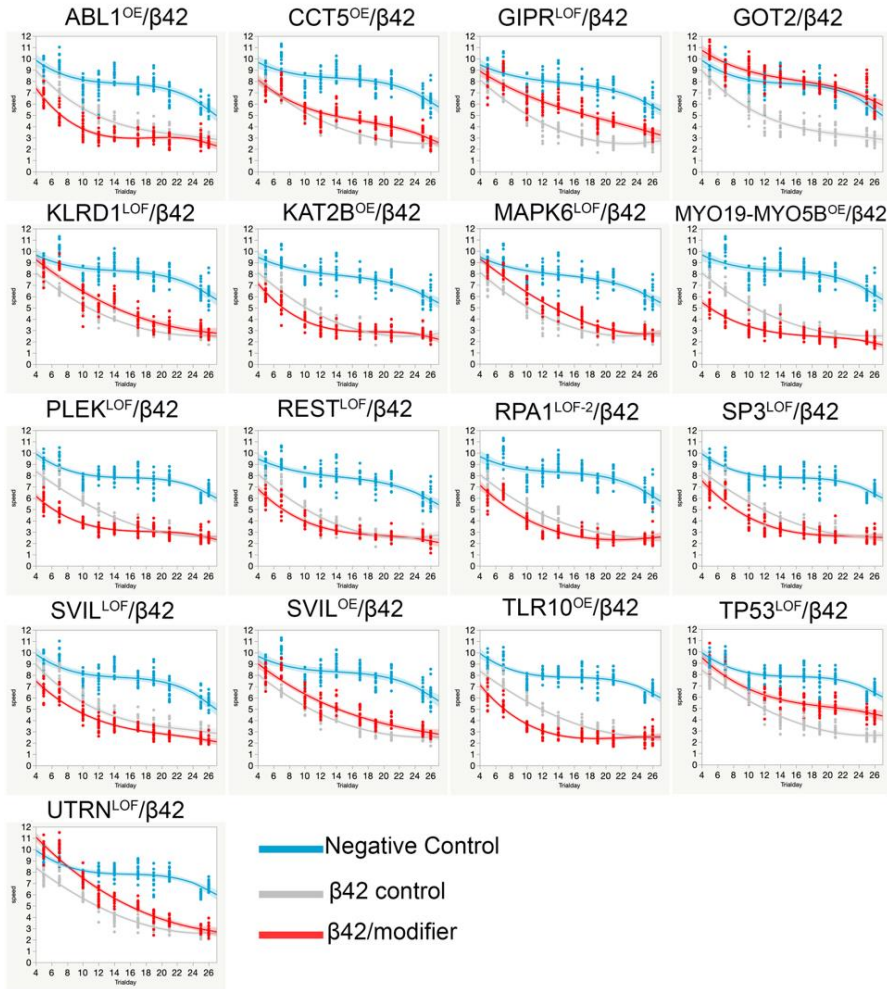

36

37 **Figure S4. GeneEMBED candidates modulate  $\beta$  amyloid-induced neuronal dysfunction,**

38 **Related to Figure 4.** Regressions representing average speed as a function of age in control fruit

39 flies (blue) or flies expressing human wild type  $\beta$  amyloid either alone (grey) or together with the

40 above indicated modifiers (red) on the corresponding Drosophila homolog (see supplementary

41 table 12 for genotype details). Charts show third degree polynomials and confidence intervals. All

42 differential effects were statistically significant ( $p < 0.01$ ) following ANOVA analysis on Linear mixed

43 models regression with fitted splines

44

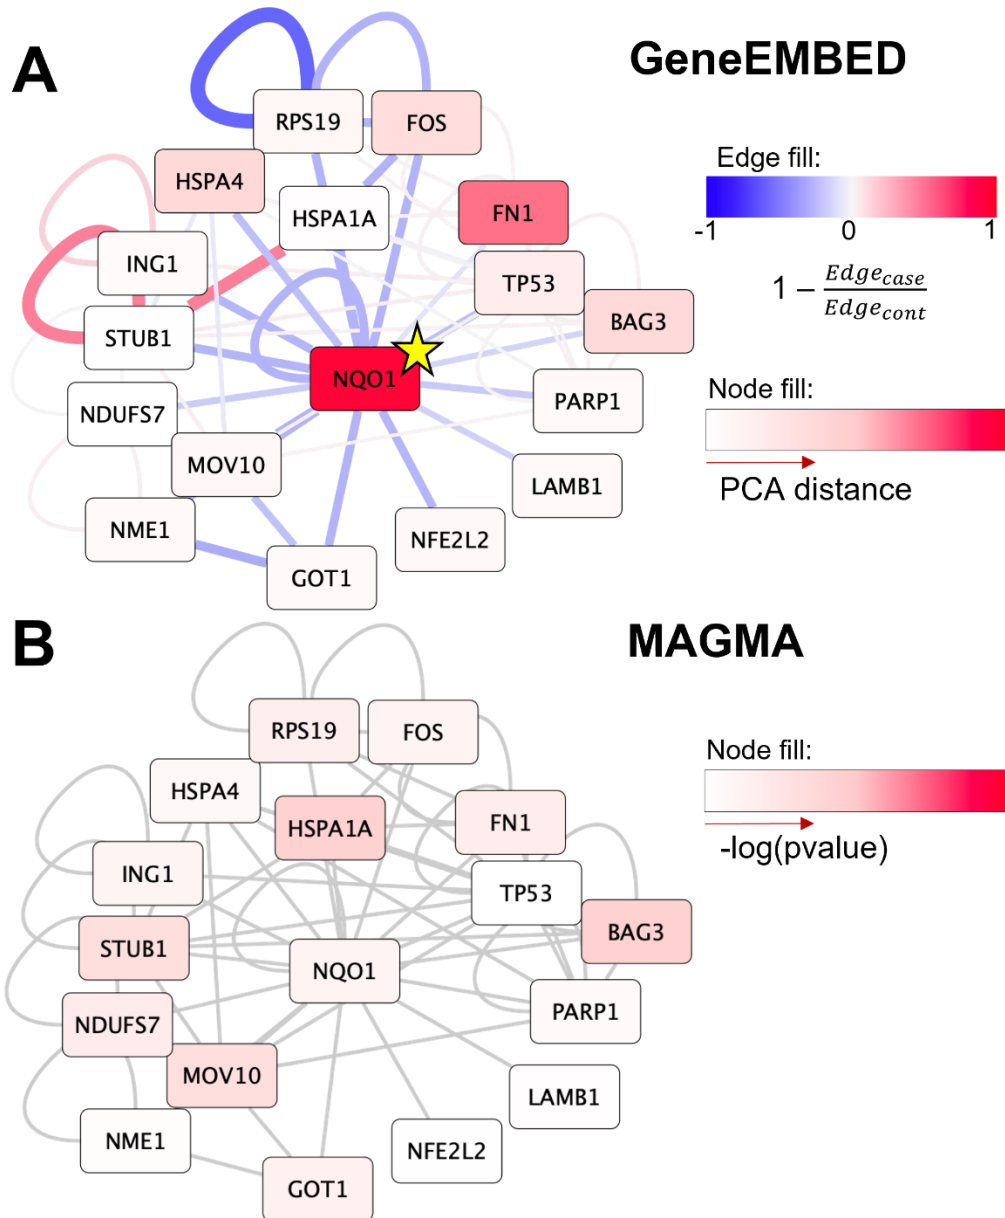

45

46 **Figure S5. Visual example of GeneEMBED's network informed gene discovery, Related to**

47 **Figure 1.** (A) Network of *NQO1* from the Brain network. Edge color represents the zero-centered

48 ratio of mutation edge weight in cases versus controls. Edge width represents the magnitude of

49 this ratio. Node fill is represented by PCA distance from GeneEMBED on the Discovery cohort

50 using EA. The star on *NQO1* indicates that this gene was identified with  $FDR < 0.01$  in

51 GeneEMBED analysis. (B) shows the same network but with node fill corresponding to the  $-\log(pvalue)$  from

52 MAGMA analysis on the Discovery cohort. Subtle network differences allow

53 GeneEMBED to identify *NQO1* when mutational data alone would not suffice.

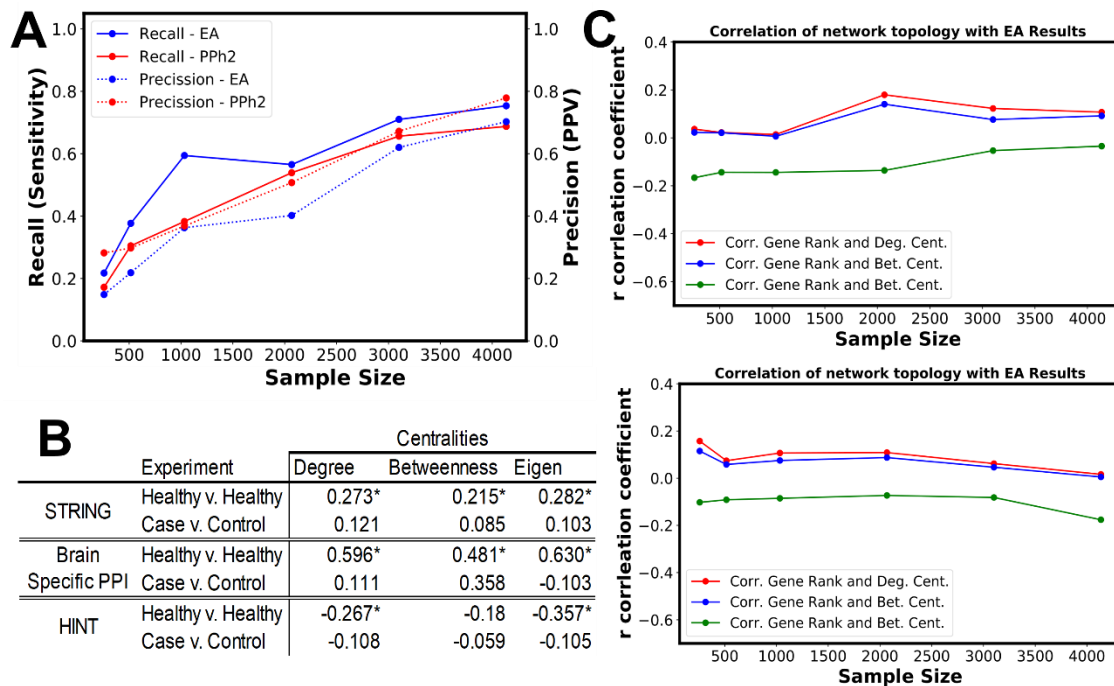

55

56 **Figure S6. GeneEMBED is robust to low sample sizes, Related to Figure 1.** (A) Plot of precision  
 57 and recall of GeneEMBED identified genes at decreased sample sizes relative to genes identified  
 58 using the full Discovery cohort. (B) Spearman rank-order correlation between genes identified using  
 59 the three brain networks applied to Healthy vs Healthy controls or case vs control experiment.  
 60 Asterisk indicates statistically significant ( $p < 0.05$ ) correlation. When disease relevant information is  
 61 removed from data, GeneEMBED relies on network topology to rank genes. (C) Spearman rank-  
 62 order correlation between candidates identified at low cohort sizes.

63

64

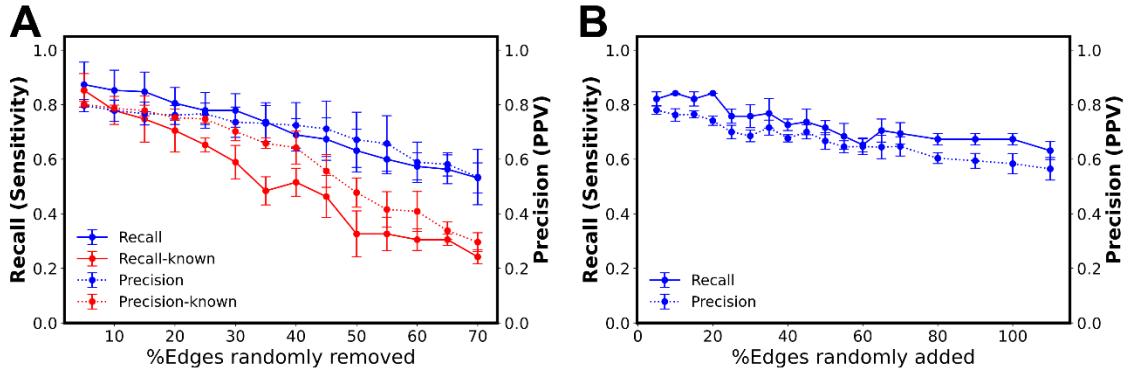

65

66 **Figure S7. GeneEMBED is robust to false negative and false positive edges, Related to**

67 **Figure 1.** (A) Edges were synthetically and randomly deleted from the Brain network to test

68 sensitivity of GeneEMBED to false negative edges. In blue are plots of precision and recall of

69 GeneEMBED identified genes at various levels of randomly deleted edges. In red are plots of

70 precision and recall of GeneEMBED identified genes when randomly deleted edges are targeted

71 for known (previously identified) genes. (B) Edges were synthetically and randomly added to the

72 Brain network to test sensitivity of GeneEMBED to false positive edges. The plot shows precision

73 and recall of GeneEMBED identified genes at various levels of synthetically added edges. X-axis

74 of '% Edges Added' is relative to the original network size, e.g. at 100%, ~48k edges are randomly

75 added.
